# Supplementary material
Source: PubMed Central journal article supplement (PMC3444296)

## **Supporting Information**

### **Arthrobacter Endo- $\beta$ -N-acetylglucosaminidase Shows Transglycosylation Activity on Complex Type N-Glycan Oxazolines. One-pot Conversion of Ribonuclease B to Sialylated Ribonuclease C**

Wei Huang, Qiang Yang, Midori Umekawa, Kenji Yamamoto, and Lai-Xi Wang<sup>\*</sup>

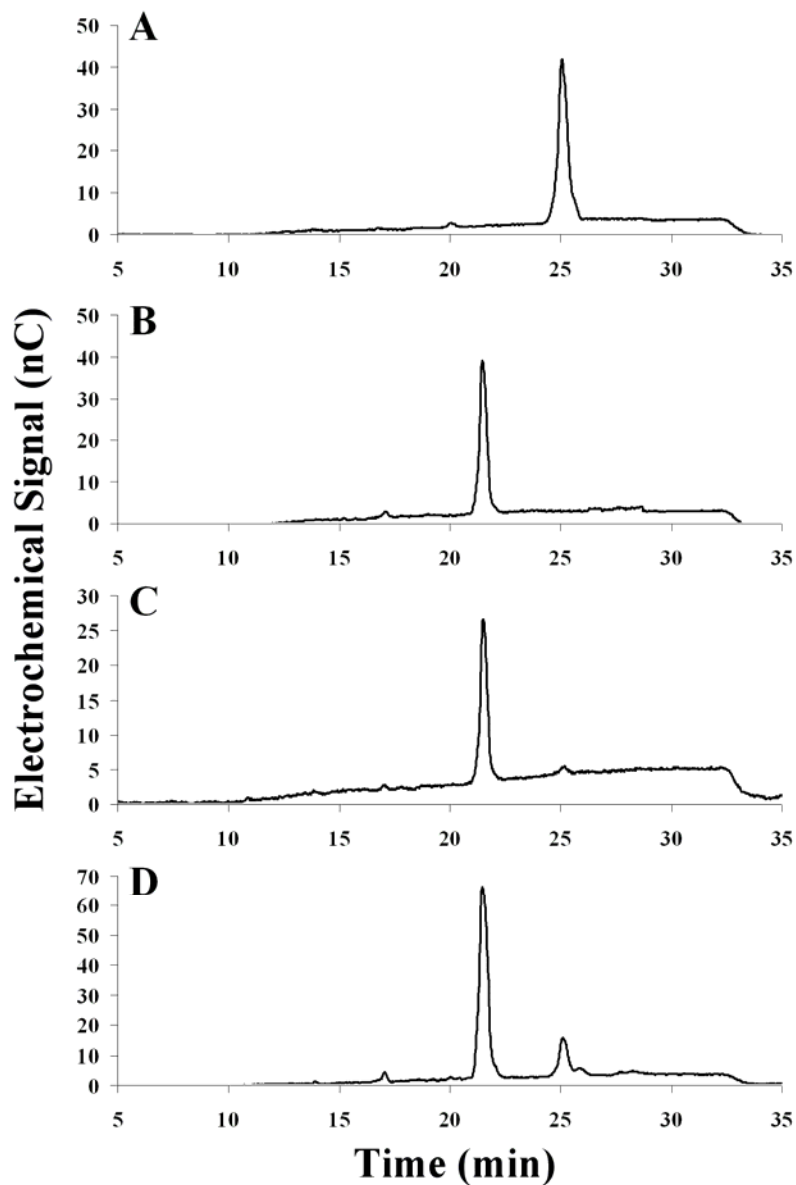

**Figure S1.** HPAEC monitoring of sialoglycan oxazoline formation using different reaction conditions. A mixture of the sialoglycan (SCT), DMC, and a base in water was stirred at 4 °C for 15 min. Then an aliquot was taken and subject to HPAEC analysis. (A) the standard sialoglycan SCT; (B) SCT: DMC : Et<sub>3</sub>N (1 : 15 : 42); (C) SCT : DMC : NaOH (1 : 15 : 25); and (D) SCT : DMC : K<sub>2</sub>CO<sub>3</sub> (1 : 20 : 40).

**Table S1**

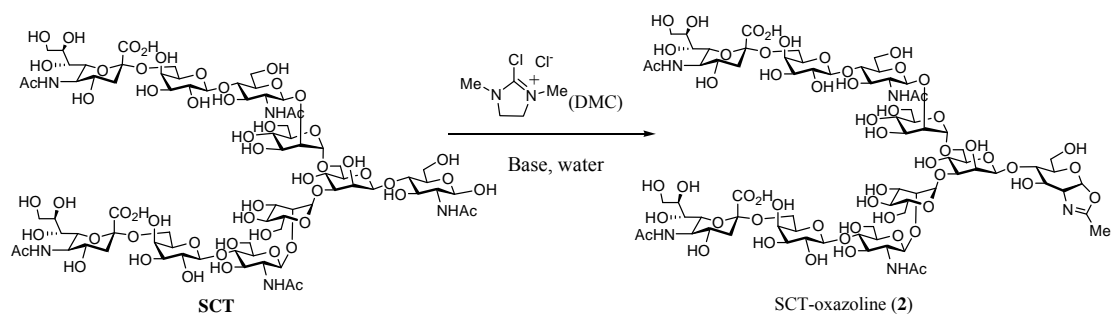

| Entry | DMC    | base                                    | Yield <sup>a</sup> |
|-------|--------|-----------------------------------------|--------------------|
| 1     | 15 eq. | Et <sub>3</sub> N, 42 eq.               | 100 %              |
| 2     | 12 eq. | Et <sub>3</sub> N, 25 eq.               | 91 %               |
| 3     | 8 eq.  | NaOH, 20 eq.                            | 45 %               |
| 4     | 12 eq. | NaOH, 20 eq.                            | 84 %               |
| 5     | 15 eq. | NaOH, 25 eq.                            | 95 %               |
| 6     | 10 eq. | K <sub>2</sub> CO <sub>3</sub> , 20 eq. | 45 %               |
| 7     | 20 eq. | K <sub>2</sub> CO <sub>3</sub> , 30 eq. | 75 %               |
| 8     | 20 eq. | K <sub>2</sub> CO <sub>3</sub> , 40 eq. | 81 %               |

<sup>a</sup> Reaction yields were calculated on the basis of measurement by HPAEC (DIONEX)

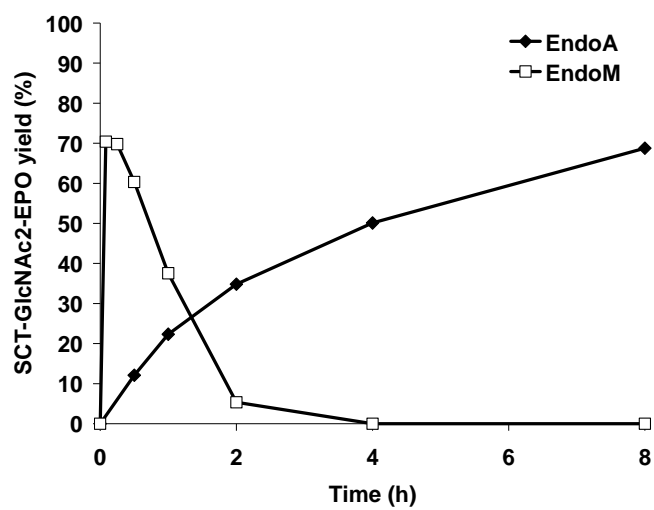

**Figure S2.** Time course of enzymatic transglycosylation of sialoglycan oxazoline (**2**) and GlcNAc-pentapeptide (**3**) catalyzed by Endo-A (◆) and EndoM (□).

## Experimental Procedures

**Materials and methods.** Natural bovine ribonuclease B (RNase B) was purchased from Sigma-Aldrich and purified by the reported method (K. Witte, et al, *J. Am. Chem. Soc.*, **1997**, *119*, 2114-2118). Endo-A was overproduced following the literature (Fujita, et al, *Biochem. Biophys. Res. Commun.*, **2000**, *267*, 134-138). The hydrolytic activity of Endo-A was defined as following: 1 unit of hydrolytic activity of Endo-A is the amount of enzyme required to hydrolyze 1  $\mu$ mol of Man<sub>9</sub>GlcNAc<sub>2</sub>Asn (at 10 mM) in 1 min at 30 °C in a phosphate buffer (50 mM, pH 6.5). EndoM-N175A was overproduced according to the previously reported method (M. Umekawa et al, *J. Biol. Chem.*, **2008**, *283*, 4469-4479). The transglycosylation activity of Endo-A or Endo-M-N175A was defined as follows: 1 mU of transglycosylation activity was defined as the amount of Endo-A or EndoM-N175A needed for transferring 1 nmol of Man<sub>3</sub>GlcNAc-oxazoline to GlcNAc-PNP in 1 min at 23 °C in a phosphate buffer (50 mM, pH 7.0).

**Analytical RP-HPLC** was performed on a Waters 626 HPLC instrument with a Symmetry300<sup>TM</sup> C18 column (5.0  $\mu$ m, 4.6  $\times$  250 mm) at 40°C. The column was eluted with a linear gradient of MeCN at a flow rate of 1 mL/min using one of the following two gradient methods: (A) 0-30% MeCN containing 0.1% trifluoroacetic acid (TFA) for 18 min; (B) 23-29% MeCN containing 0.1% TFA for 30 min. Preparative HPLC was performed on a Waters 600 HPLC instrument with a preparative C18 column (Symmetry300<sup>TM</sup>, 7.0  $\mu$ m, 19  $\times$  300 mm). The column was eluted with a suitable gradient of water/acetonitrile containing 0.1% TFA.

**High-performance anion-exchange chromatography with pulsed amperometric detection (HPAEC-PAD)** was performed on a DIONEX DX600 chromatography system (DIONEX Corporation, Sunnyvale, CA) equipped with an electrochemical detector (ED50) and an anion exchange column (CarboPac PA100, 4  $\times$  250 mm). The mobile phase (flow rate, 1.0 mL/min) was composed of deionized water (eluent A), 1 M NaOAc (eluent B), and 0.2 M NaOH (eluent C). The gradient used was as follows: 0 min, 50% eluent A, 0% eluent B, 50% eluent C; 5.0 min, 50% eluent A, 0% eluent B, 50% eluent C; and 25.0 min, 35% eluent A, 15% eluent B, and 50% eluent C.

**NMR** spectra were measured with JEOL ECX 400 MHz and/or Inova 500 MHz NMR spectrometers.

**ESI-MS** Spectra were measured on a Waters Micromass ZQ-4000 single quadrupole mass spectrometer.

**MALDI-TOF MS** spectra were recorded on an Autoflex II MALDI-TOF mass spectrometer (Bruker Daltonics). The instrument was calibrated by using ProteoMass Peptide MALDI-MS calibration kit (MSCAL2, Sigma/Aldrich). The matrix used for glycans is 2,5-dihydroxybenzoic acid (DHB) (10 mg/mL in 50% acetonitrile containing 0.1% trifluoroacetic acid). The measuring conditions in detail: 337 nm nitrogen laser with 100  $\mu$ J output; laser frequency 50.0 Hz; laser power 30-45%; linear mode; positive polarity; detection range 1000-10000; pulsed ion extraction: 70ns; high voltage: on; realtime smooth: high; shots: 500-2000.

**Synthesis of the sialylated complex-type N-glycan oxazoline (2).** SCT (10 mg, 5  $\mu$ mol) and 2-chloro-1,3-dimethylimidazolinium chloride (DMC, 12.6 mg, 75  $\mu$ mol) were dissolved in 0.2 mL of water at 4 °C. Then Et<sub>3</sub>N (30  $\mu$ L, 215  $\mu$ mol) was added and the mixture was shaken at 4 °C for 30 min. HPAEC indicated the completion of reaction. The residue was subject to gel filtration on a Sephadex G-15 column. The column was eluted by water containing 0.05% Et<sub>3</sub>N. The fractions containing the sialoglycan-oxazoline were combined. The fractions were mixed with an aqueous solution of NaOH (0.1 M, 10  $\mu$ L) and were then lyophilized to give the sialoglycan-oxazoline (**2**) as a white powder (9.8 mg, quantitative yield). The inclusion of a catalytic amount of NaOH ensures an alkaline situation for the oxazoline for its stability after freeze-dry.. <sup>1</sup>H NMR (D<sub>2</sub>O, 500 MHz) of oxazoline **2**:  $\delta$  6.09 (d, 1 H,  $J$  = 7.5 Hz, H-1 of oxazoline), 5.11 (s, 1 H, H-1 of  $\alpha$ -Man), 4.95 (s, 1 H, H-1 of  $\alpha$ -Man), 4.74 (s, 1 H, H-1 of  $\beta$ -Man), 4.58 (m, 2 H, H-1 of two  $\beta$ -GlcNAc), 4.42 (d, 2 H,  $J$  = 9.0 Hz, H-1 of two  $\beta$ -Gal), 4.37 (m, 1 H), 4.16 (m, 4 H), 2.65 (m, 2 H, H-3<sub>ax</sub> of sialic acid), 2.06 (s, 3 H, Ac), 2.05 (s, 6 H, Ac, CH<sub>3</sub> of oxazoline), 2.01 (s, 6 H, 2 Ac), 1.71 (t, 2 H,  $J$  = 12.0 Hz, H-3<sub>eq</sub> of sialic acid); <sup>13</sup>C NMR (D<sub>2</sub>O, 125 MHz, from HSQC)  $\delta$  103.5 (C-1 of Gal), 101.2 (C-1 of  $\beta$ -Man), 100.3 (C-1 of oxazoline), 99.7 (C-1 of  $\alpha$ -Man), 99.5 (C-1 of GlcNAc), 96.4 (C-1 of  $\alpha$ -Man), 40.2 (C-3 of sialic acid), 22.7-21.3 (CH<sub>3</sub> of Ac), 13.1 (CH<sub>3</sub> of oxazoline); HPAEC-PAD:  $t_R$  = 21.4 min; ESI-MS: calculated for C<sub>76</sub>H<sub>123</sub>N<sub>5</sub>O<sub>56</sub>, M = 2001.69 Da; found (m/z), 1001.44 [M + 2H]<sup>2+</sup>.

**Endo-A catalyzed transglycosylation with sialoglycan-oxazoline (2). Synthesis of sialylated glycopeptide (4).** A solution of sialoglycan oxazoline **2** (1.5 mg, 0.75  $\mu$ mol) and GlcNAc-pentapeptide (**3**) (200  $\mu$ g, 0.25  $\mu$ mol) in a phosphate buffer (50 mM, pH 7.0, 10  $\mu$ L) was incubated with Endo-A (200 mU/ $\mu$ L) at 23 °C for 8 h. The transglycosylation product was then purified by

preparative HPLC to give glycopeptide **4** (472  $\mu$ g, 68%). Analytical HPLC (Method A):  $t_R$  = 13.7 min. ESI-MS: calculated for  $C_{108}H_{179}N_{13}O_{70}$ ,  $M$  = 2778.08 Da; found ( $m/z$ ), 1390.68  $[M + 2H]^{2+}$ , 927.67  $[M + 3H]^{3+}$ .

**One-pot conversion of RNase B into sialylated RNase C by Endo-A.** A solution of sialoglycan oxazoline **2** (1.4 mg, 0.72  $\mu$ mol) and RNase B (840  $\mu$ g, 0.06  $\mu$ mol) in a phosphate buffer (50 mM, pH 7.0, 10  $\mu$ L) was incubated with Endo-A (700 mU/ $\mu$ L) at 23 °C for 4 h. The transglycosylation product was then purified by preparative HPLC to give the sialylated RNase C (240  $\mu$ g, 25%). Analytical HPLC (Method B):  $t_R$  = 20.8 min. ESI-MS: calculated,  $M$  = 15886 Da; found ( $m/z$ ), 1766.86  $[M + 9H]^{9+}$ , 1590.27  $[M + 10H]^{10+}$ , 1445.39  $[M + 11H]^{11+}$ , 1325.05  $[M + 12H]^{12+}$ , and 1223.20  $[M + 13H]^{13+}$ . The deconvolution data,  $M$  = 15888.35  $\pm$  0.63 Da.

**One-pot conversion of RNase B into sialylated RNase C by a combined use of Endo-A and EndoM-N175A.** A solution of sialoglycan oxazoline **2** (1.4 mg, 0.72  $\mu$ mol) and RNase B (840  $\mu$ g, 0.06  $\mu$ mol) in a phosphate buffer (50 mM, pH 7.0, 10  $\mu$ L) was incubated with Endo-A (10 mU/ $\mu$ L) and EndoM-N175A (10 mU/ $\mu$ L) at 23 °C for 4 h. The transglycosylation product was then purified by preparative HPLC to give sialylated RNase C (678  $\mu$ g, 70%). The product was confirmed to be the same as described above for using the Endo-A alone.

### Characterization of glycopeptide (**4**)

The ESI-MS deconvolution data ( $M$  = 2779.36) of glycopeptide **4** was in good agreement with the calculated data ( $M$  = 2779.07); treatment of **4** with pronase, which hydrolyzes all the peptide bonds, gave the expected Asn-linked sialoglycan SCT-Asn (ESI-MS: calculated,  $M$  = 2336.83; found ( $m/z$ ), 2360.32  $[M+Na^+]$ ), indicating that the glycan was attached to the Asn-linked GlcNAc moiety in the peptide during transglycosylation; and, finally, treatment of **4** with Endo-M, which is specific for cleaving the GlcNAc $\beta$ 1 $\rightarrow$ 4GlcNAc linkage in complex type N-glycans, gave the free sialoglycan (SCT) and the GlcNAc-pentapeptide (**3**). These results confirm that the newly formed glycosidic bond in product **4** is the expected GlcNAc $\beta$ 1 $\rightarrow$ 4GlcNAc linkage.

$^1\text{H}$  NMR of the sialoglycan (SCT)

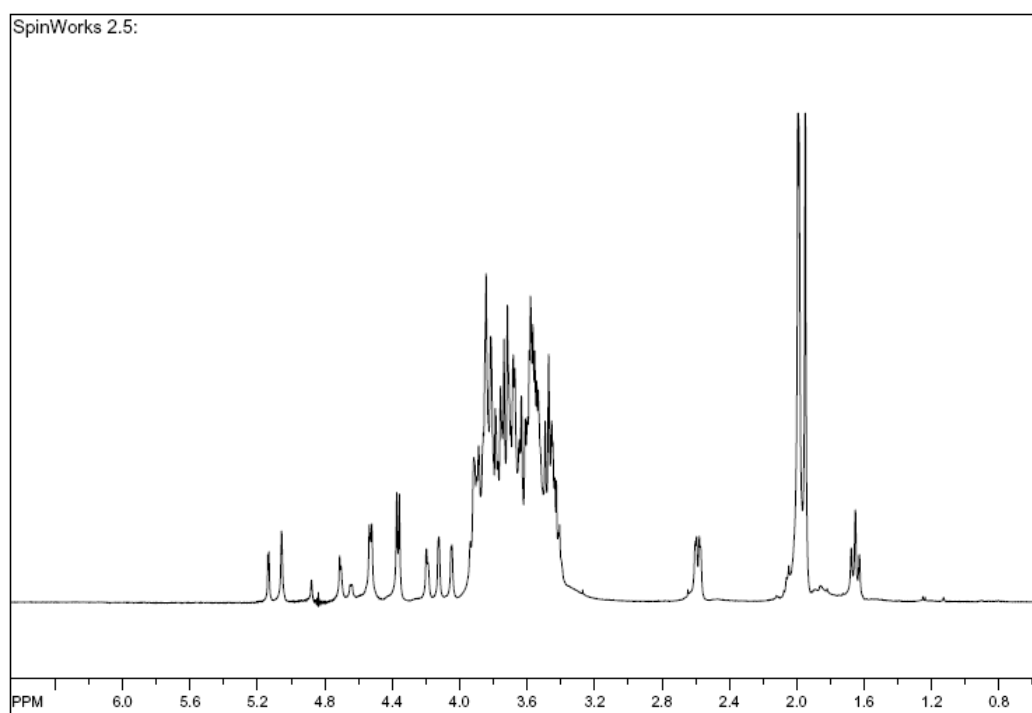

$^1\text{H}$  NMR of the sialoglycan-oxazoline (**2**)

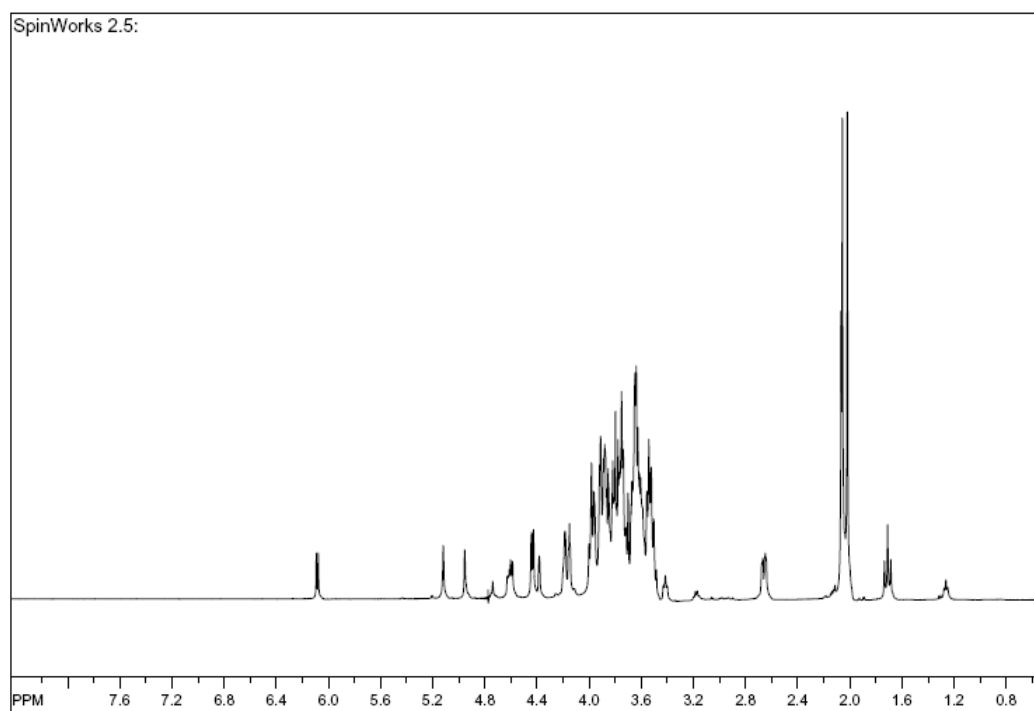

$^1\text{H}$ - $^{13}\text{C}$  HSQC of the sialoglycan-oxazoline (**2**)

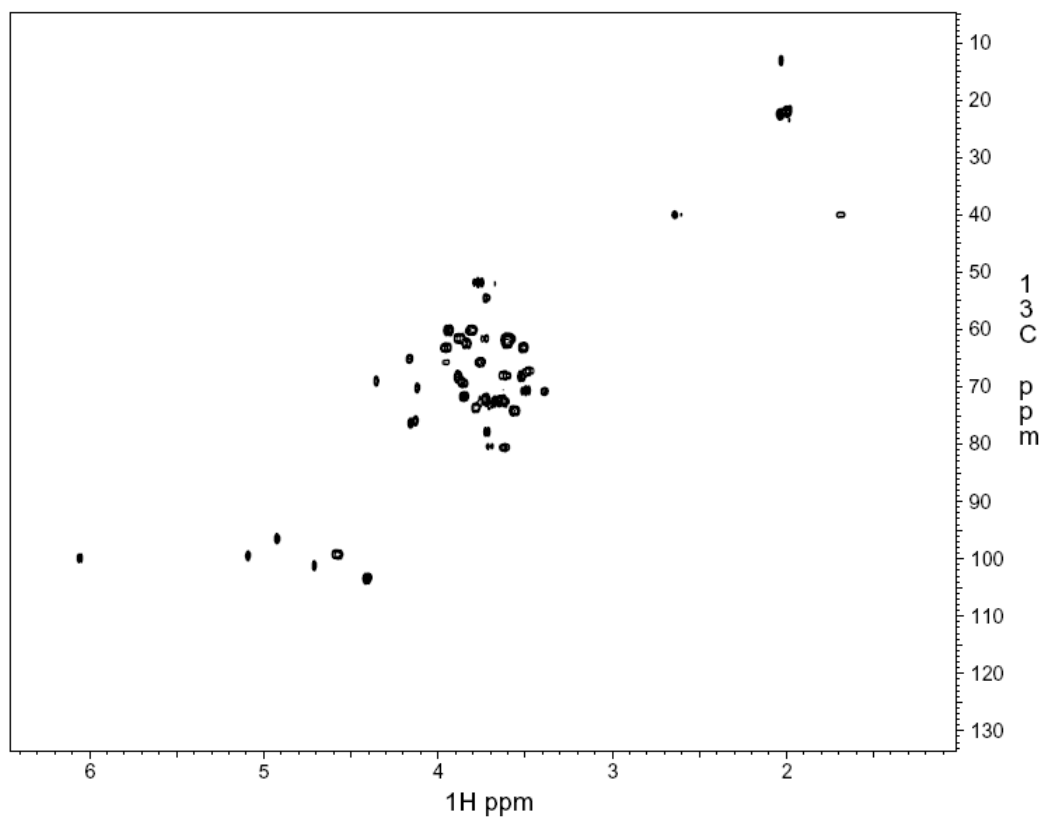

Supplement: NIHMS379219-supplement-supporting_information.pdf [file NIHMS379219-supplement-supporting_information.pdf]
